# Supplementary material for: Structural modifications that increase gut restriction of bile acid derivatives
Source: Royal Society of Chemistry journal article supplement (doi:10.1039/d0md00425a), 2021-01-01
Supplement: d0md00425a1.pdf [file d0md00425a1.pdf]

## Supporting Information

### Structural Modifications that Increase Gut Restriction of Bile Acid Derivatives

Ali Nakhi, Henry L. Wong, Melissa Weldy, Alexander Khoruts, Michael J. Sadowsky, Peter I. Dosa\*

### Table of Contents

|                                                 |     |
|-------------------------------------------------|-----|
| <i>C. difficile</i> spore germination assays    | S2  |
| NMR Spectra for compounds <b>14-19</b> .        | S3  |
| Table S1: TGR5 Agonist Activity of CDCA Analogs | S13 |

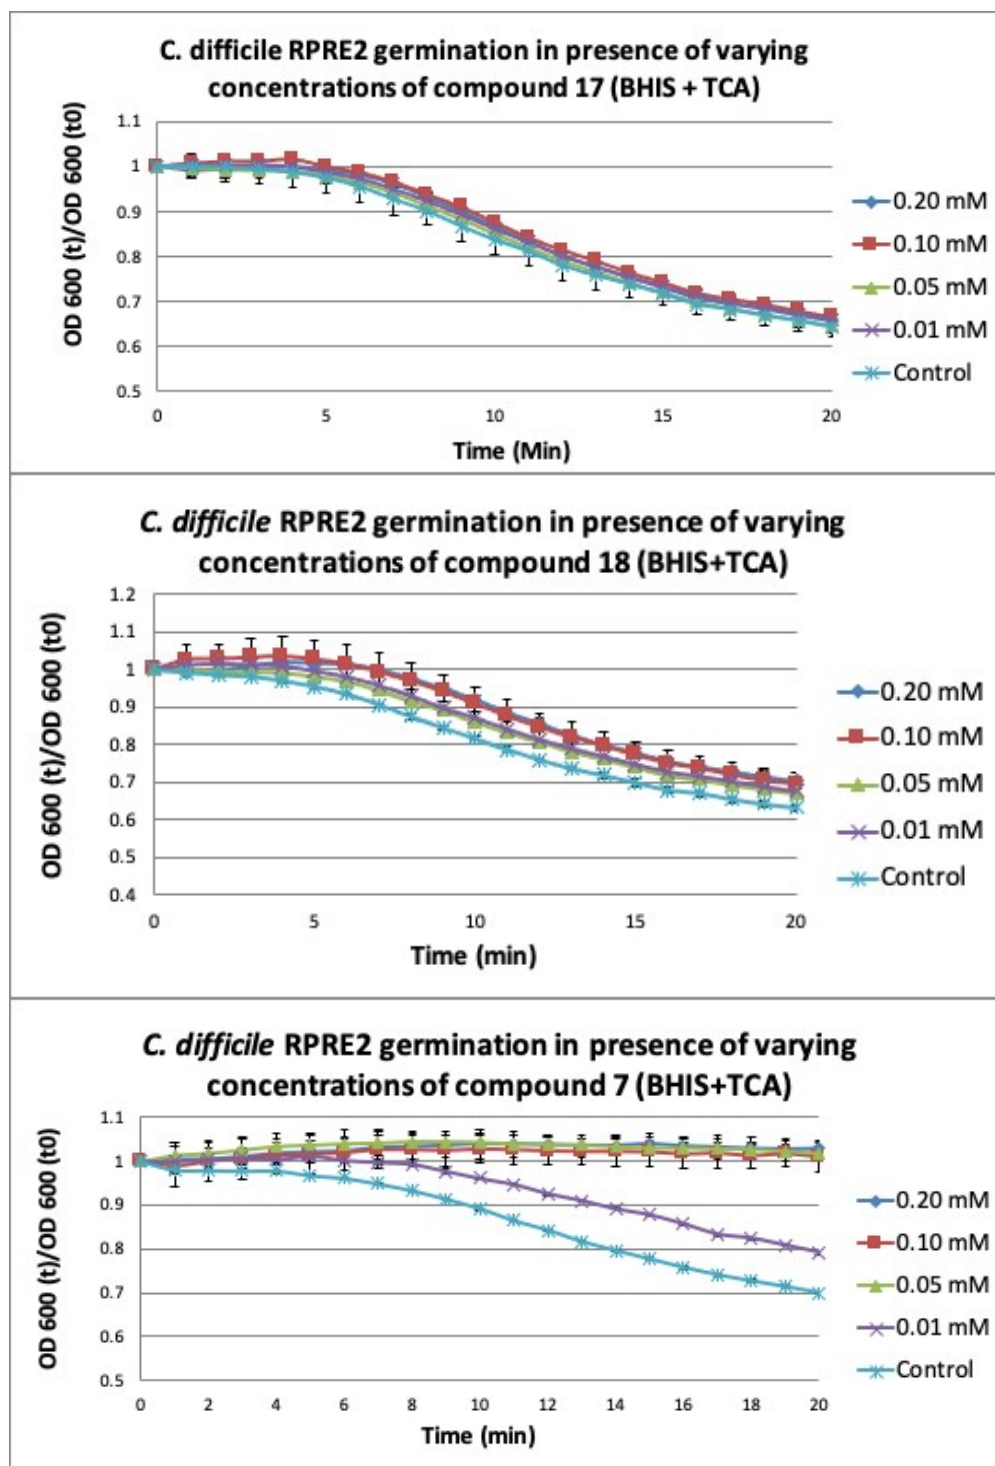

**Figure S1.** Spores of the RPRE2 strain of *C. difficile* were incubated in BHIS with 2000  $\mu$ M TCA (which promotes germination). Both compounds **17** and **18** failed to inhibit spore germination at concentrations as high as 200  $\mu$ M. In contrast, compound **7** completely inhibited spore germination at 50  $\mu$ M. For experimental conditions, see Stoltz et al. *J. Med. Chem.* **2017**, *60*, 3451-3471.

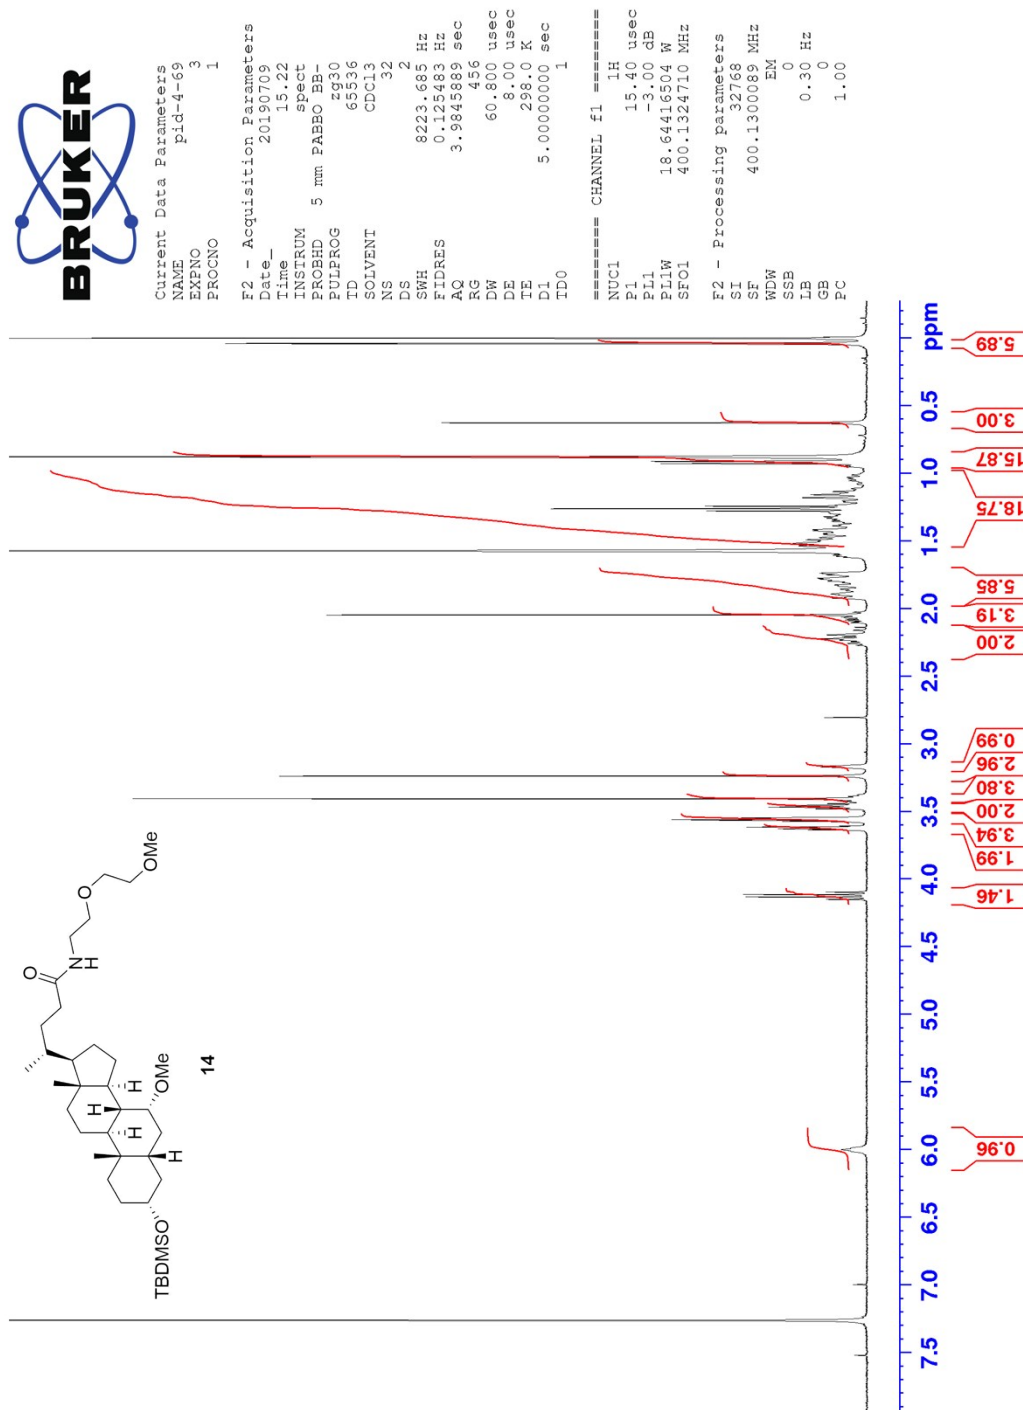

**Figure S2.**  
<sup>1</sup>H NMR spectrum of **14** (400 MHz, CDCl<sub>3</sub>).

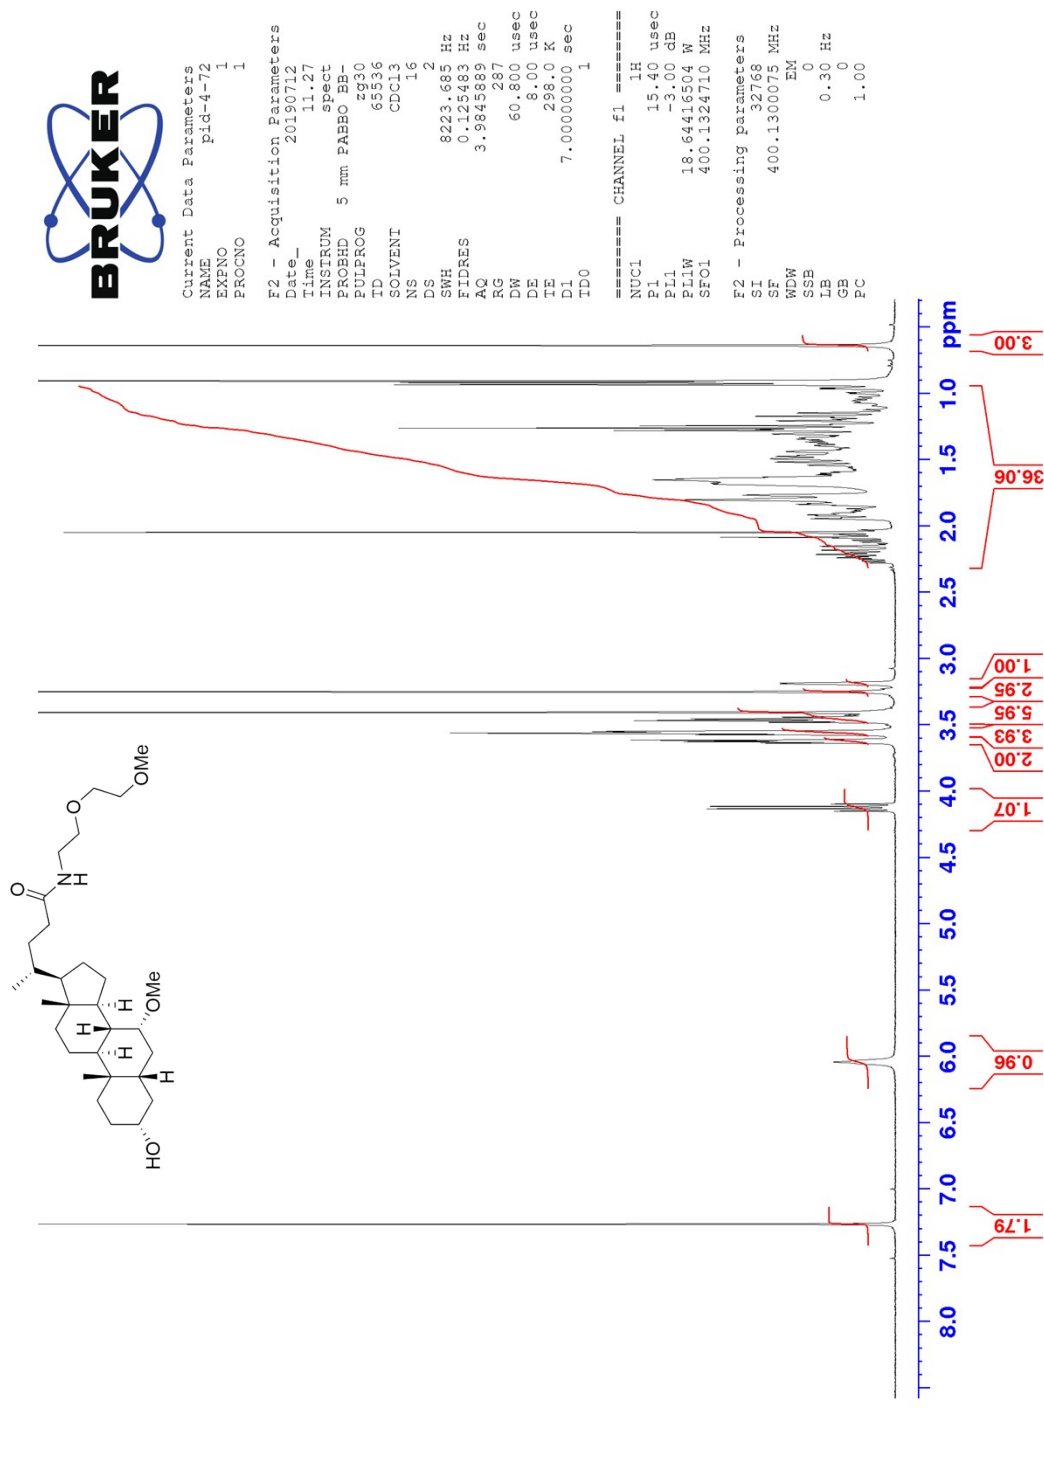

**Figure S3.**  $^1\text{H}$  NMR spectrum of **15** (400 MHz,  $\text{CDCl}_3$ ).

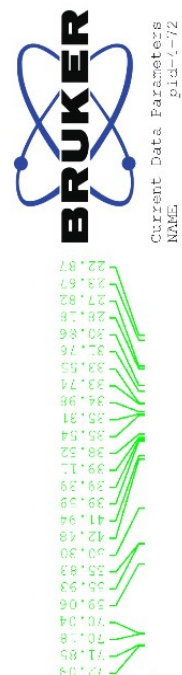

Figure S4.  $^{13}\text{C}$  NMR spectrum of **15** (100 MHz,  $\text{CDCl}_3$ ).

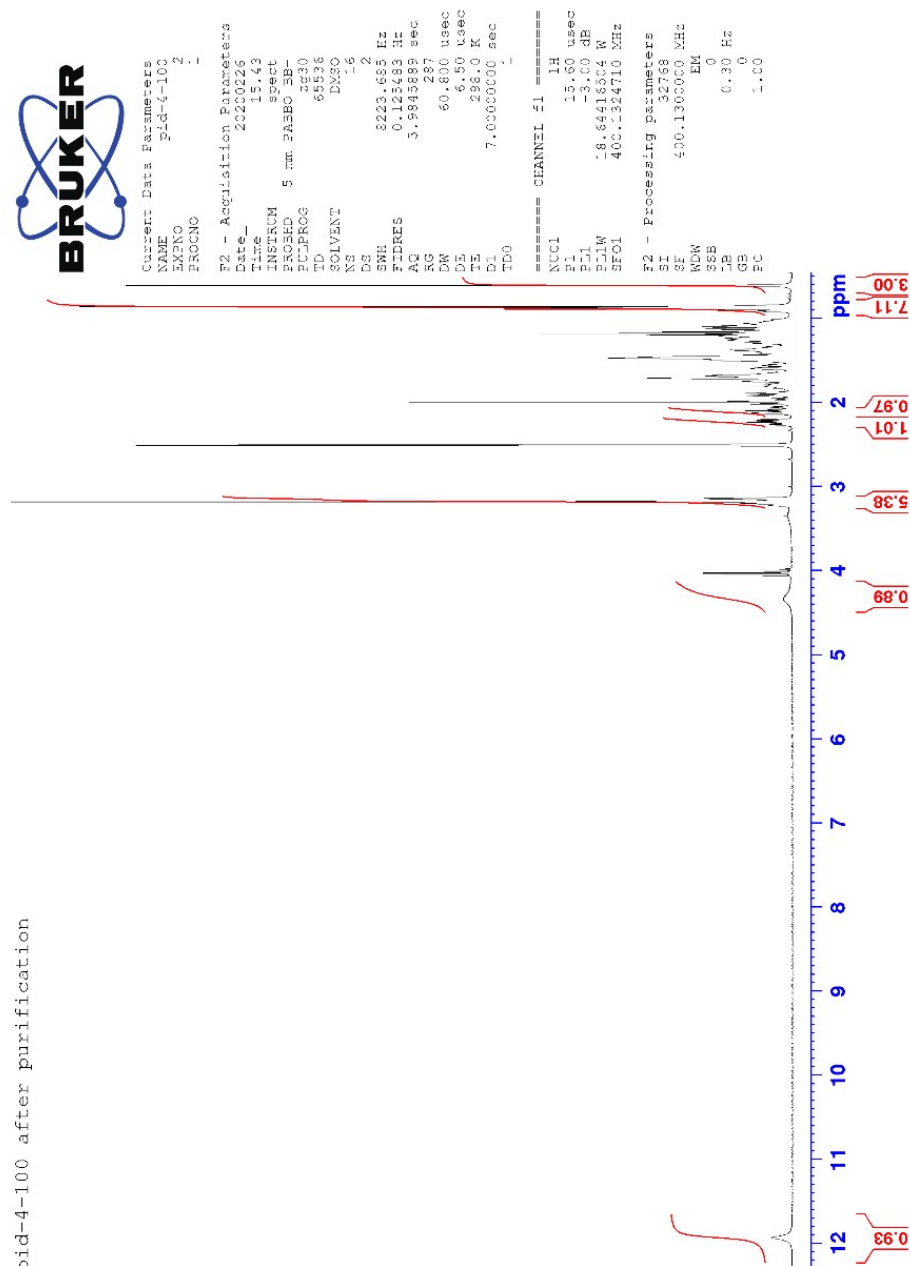

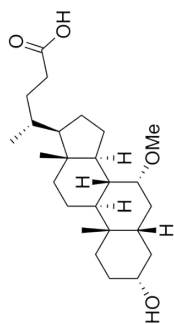

**Figure S5.**  $^1\text{H}$  NMR spectrum of **16** (400 MHz,  $\text{DMSO-d}_6$ ).

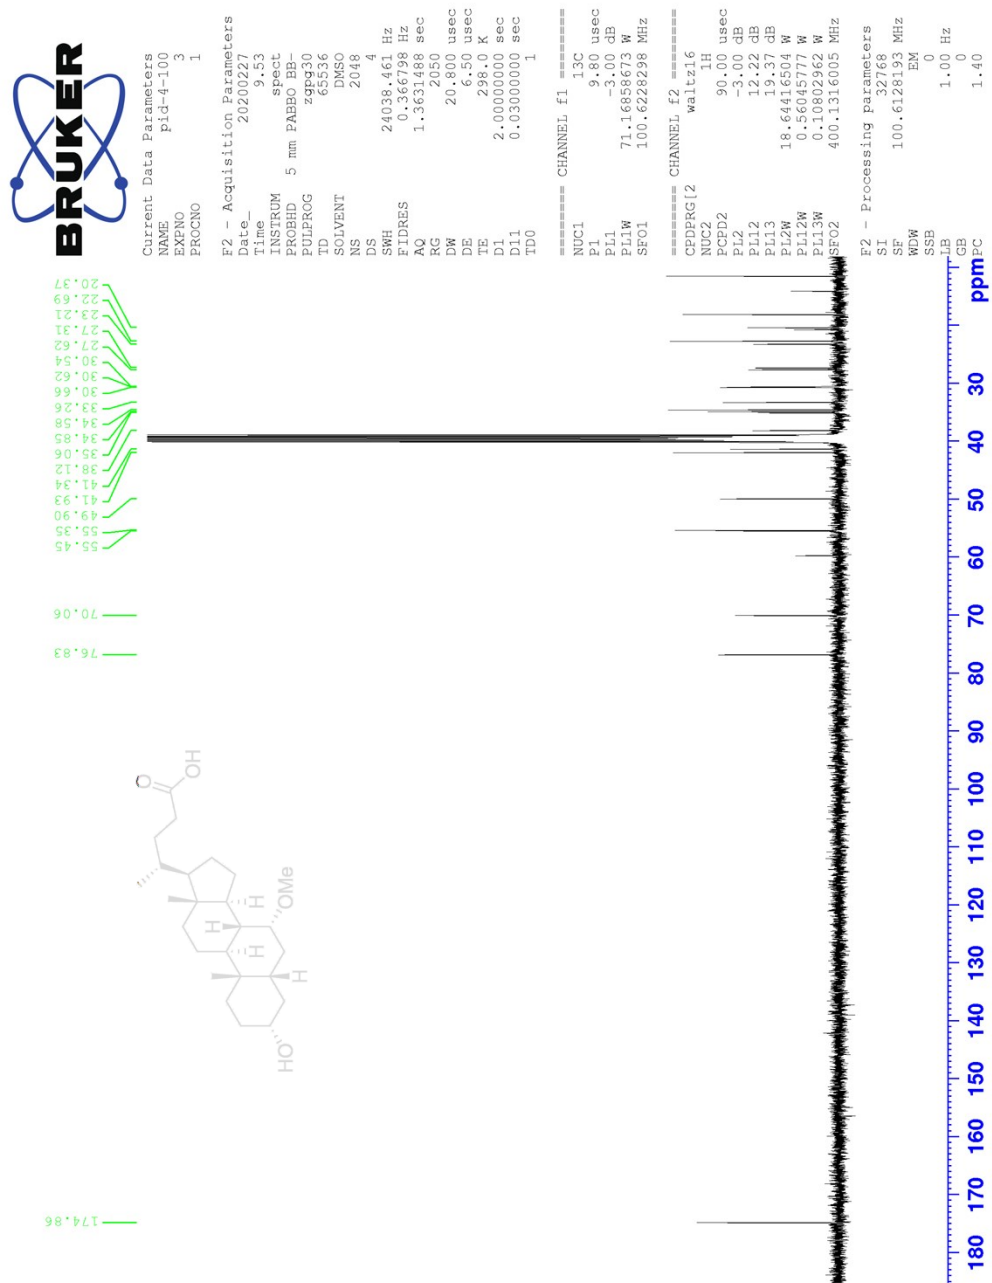

**Figure S6.**  $^{13}\text{C}$  NMR spectrum of **16** (100 MHz,  $\text{DMSO-d}_6$ ).

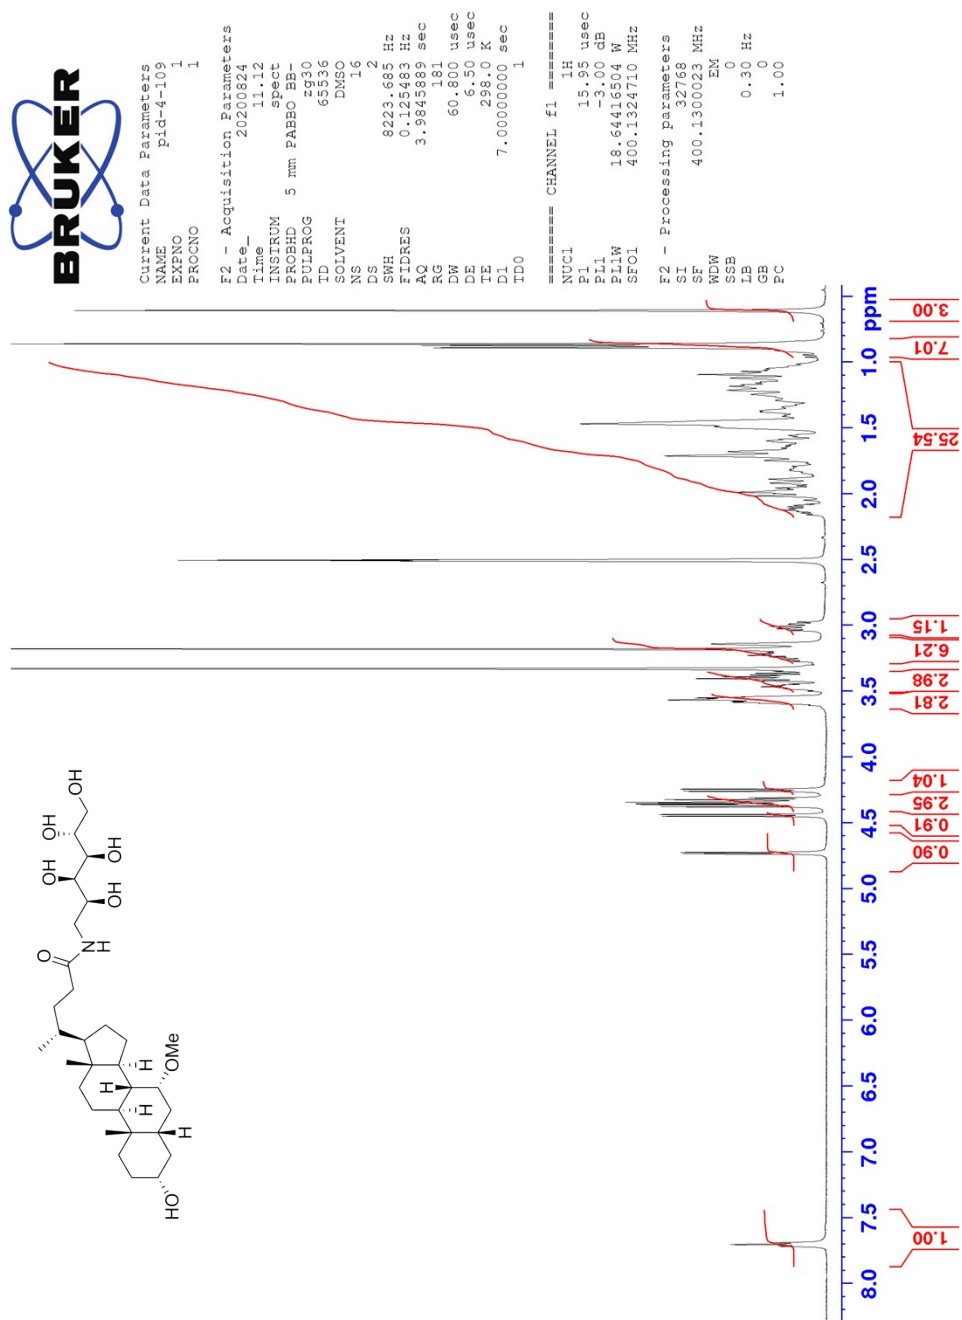

**Figure S7.** <sup>1</sup>H NMR spectrum of **17** (400 MHz, DMSO-d<sub>6</sub>).

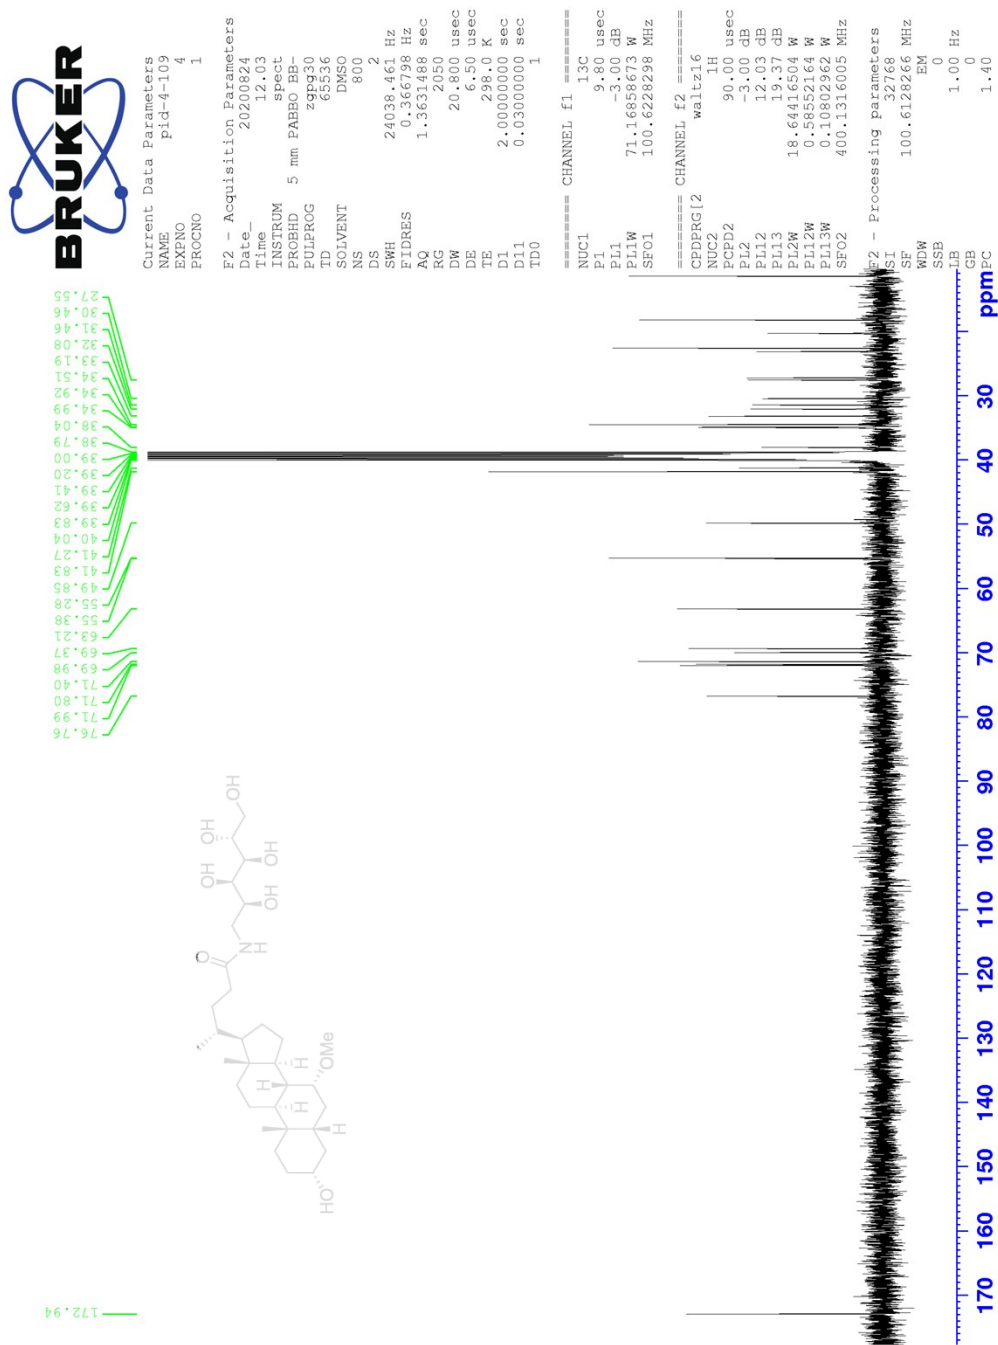

**Figure S8.**  
<sup>13</sup>C NMR spectrum of **17** (100 MHz, DMSO-d<sub>6</sub>).

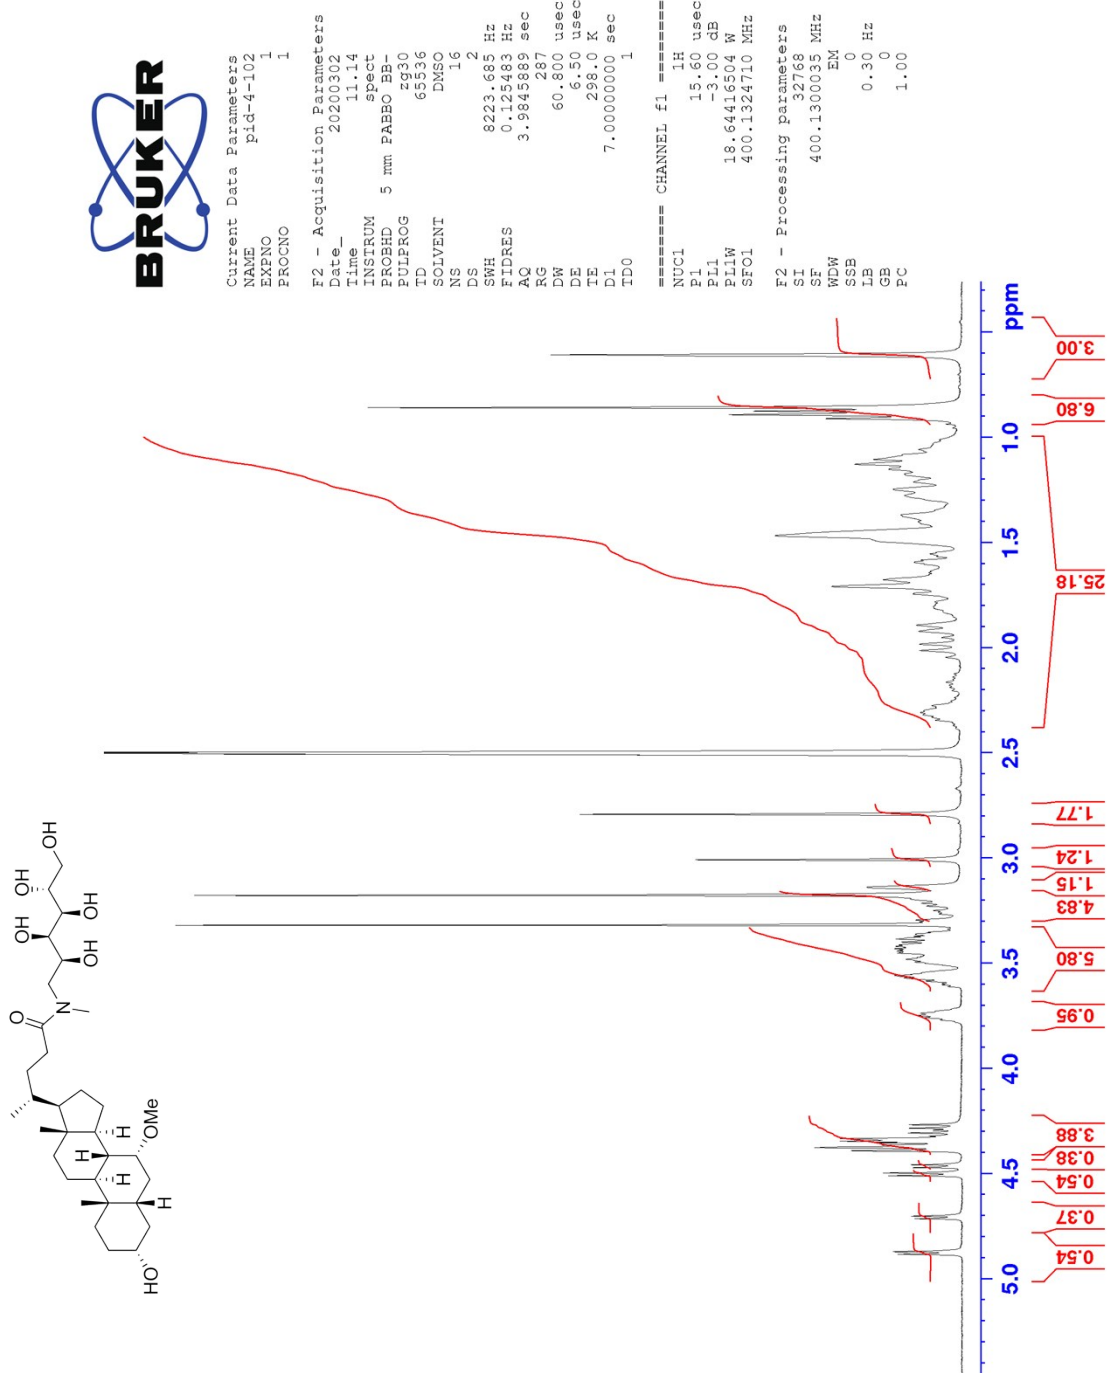

**Figure S9.**  $^1\text{H}$  NMR spectrum of **18** (400 MHz,  $\text{DMSO-d}_6$ ).



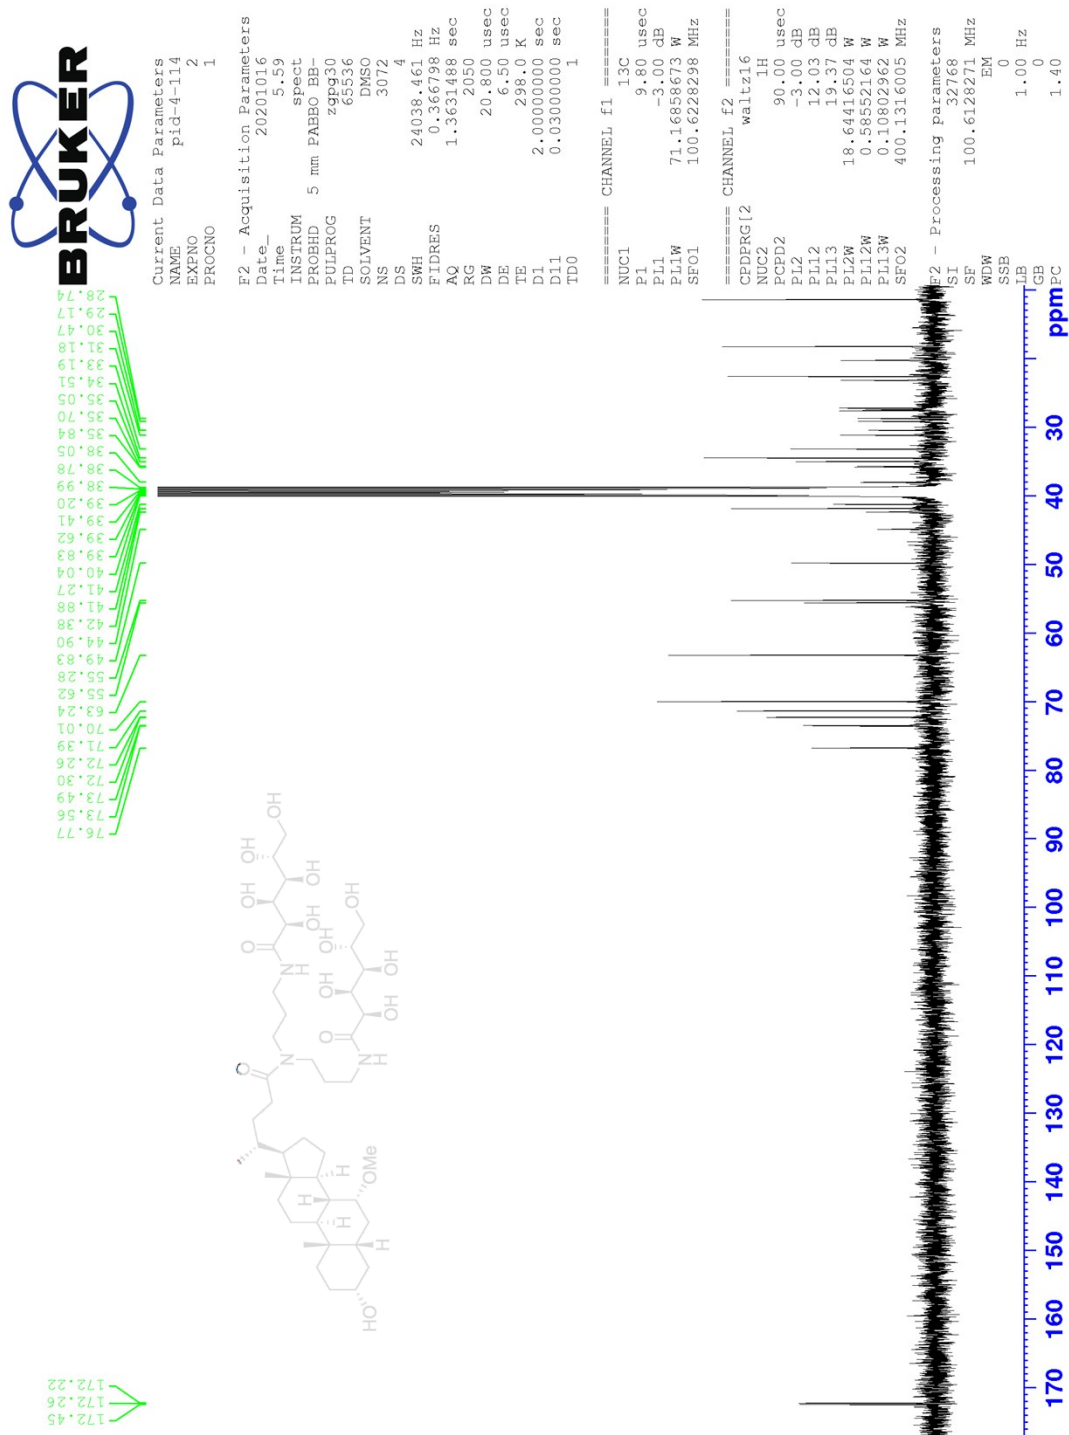

**Figure S11.**  $^{13}\text{C}$  NMR spectrum of **19** (100 MHz,  $\text{DMSO-d}_6$ ).

**Table S1:** TGR5 Agonist Activity of CDCA Analogs (Individual Experiments)

| Compound | R <sup>1</sup> | X | EC <sub>50</sub> (nM)           |
|----------|----------------|---|---------------------------------|
| 16       | -OMe           |   | 74.9, 78.8                      |
| 15       | -OMe           |   | 35.0, 64.0                      |
| 17       | -OMe           |   | 22.6, 32.8, 44.6                |
| 18       | -OMe           |   | 60.1, 64.6                      |
| 19       | -OMe           |   | 597.1, 537.6                    |
| TLCA     | -H             |   | 816.5, 941.6, 1080.5,<br>1182.8 |
